# Supplementary material for: Discovery and characterization of new crystal forms of bio-based nylon 4F salt
Source: Royal Society of Chemistry journal article supplement (doi:10.1039/d2ce00388k), 2022-01-01
Supplement: d2ce00388k1.pdf [file d2ce00388k1.pdf]

## Supporting information

### Discovery and characterization of new crystal forms of bio-based nylon 4F salt

Yingying Wang,<sup>a</sup> Pengpeng Yang,<sup>\*b</sup> Zihan Li,<sup>b</sup> Jinqiu Fu,<sup>a</sup> Yuzhong Shi,<sup>a</sup> Yajie Zhang,<sup>c</sup> Keke Zhang,<sup>\*a</sup> Wei Zhuang,<sup>a,b</sup> Hanjie Ying<sup>a,b</sup>

<sup>a</sup>Biology+ Joint Research Center, School of Chemical Engineering and Technology, Zhengzhou University, Zhengzhou, 450001, China

<sup>b</sup>National Engineering Technique Research Center for Biotechnology, State Key Laboratory of Materials-Oriented Chemical Engineering, College of Biotechnology and Pharmaceutical Engineering, Nanjing Tech University, Nanjing, 210009, China

<sup>c</sup>Ningbo Institute of Materials Technology & Engineering, Chinese Academy of Sciences, Ningbo, 315200, China

### Table of Contents

**Figure S1.** Comparison of PXRD patterns

**Figure S2.** asymmetric unit diagrams

**Figure S3.** Packing diagrams

**Table S1.** Hydrogen bonds data

**Table S2.** Torsion angles data

**Figure S4-S7.** Hirshfeld Surface Analysis and 2D fingerprint

**Table S3.** solubility data

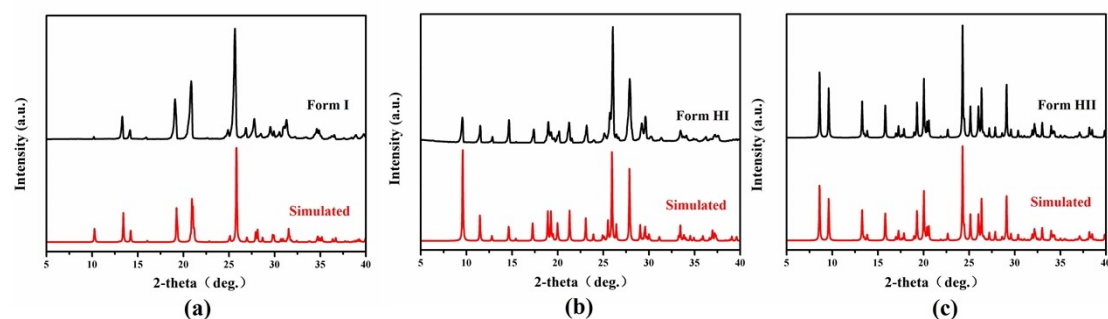

**Figure S1.** Comparison of PXRD patterns with the simulated patterns from SCXRD for three forms of nylon 4F salt.

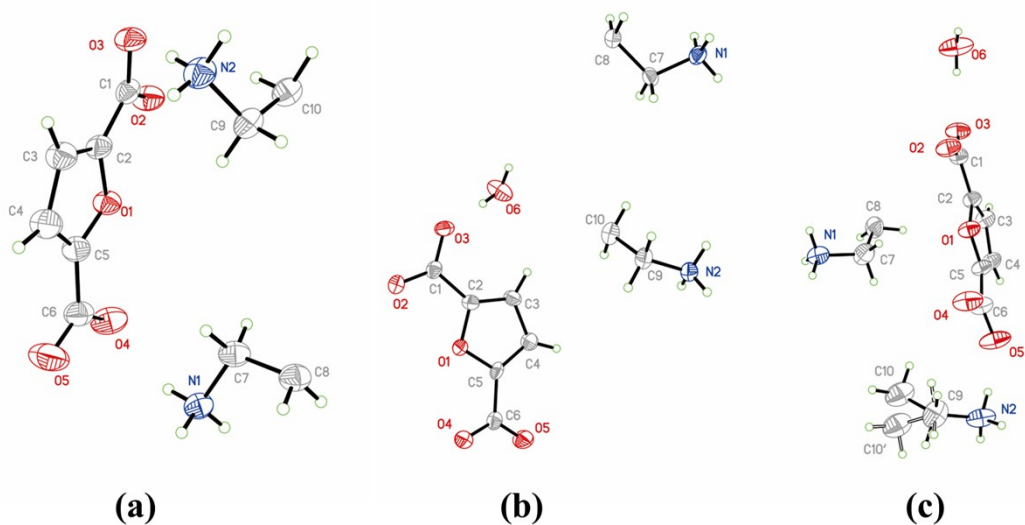

**Figure S2.** The asymmetric unit ORTEP diagrams of three crystal forms of nylon 4F monomer salt crystal forms, showing the atom-numbering schemes. Displacement ellipsoids are drawn at the 50% probability level: Form I (a) Form HI (b) and Form HII (c).

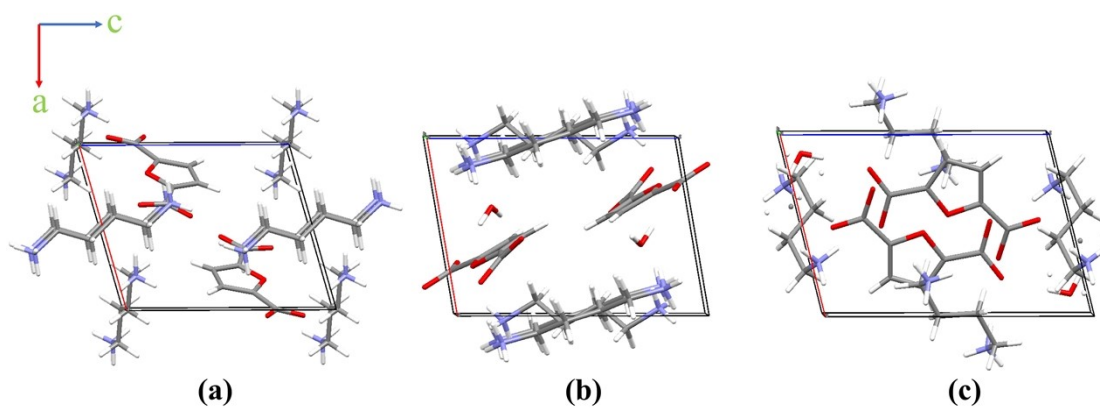

**Figure S3.** Packing diagrams of the nylon 4F monomer salt: Form I (a) Form HI (b) and Form HII (c).

**Table S1.** Hydrogen bonds data of three crystal forms of nylon 4F monomer salt.

| Form I      |            |              |              |          |
|-------------|------------|--------------|--------------|----------|
| D–H...A     | D(D-H) / Å | d(H...A) / Å | d(D...A) / Å | <DHA     |
| N1–H1A...O2 | 0.890(3)   | 1.893(2)     | 2.779(4)     | 173.3(2) |
| N1–H1B...O4 | 0.890(3)   | 2.041(3)     | 2.853(4)     | 151.2(2) |
| N1–H1C...O3 | 0.890(3)   | 2.053(3)     | 2.932(4)     | 169.0(2) |
| N1–H1C...O2 | 0.890(3)   | 2.519(2)     | 2.971(4)     | 112.1(2) |
| N2–H2A...O5 | 0.890(3)   | 2.121(4)     | 2.937(5)     | 152.1(2) |
| N2–H2A...O4 | 0.890(3)   | 2.356(3)     | 3.154(4)     | 149.3(2) |
| N2–H2B...O5 | 0.891(3)   | 1.922(3)     | 2.758(4)     | 155.7(2) |
| N2–H2C...O3 | 0.890(3)   | 2.061(3)     | 2.924(4)     | 163.3(2) |

  

| Form II     |            |              |              |          |
|-------------|------------|--------------|--------------|----------|
| D–H...A     | D(D-H) / Å | d(H...A) / Å | d(D...A) / Å | <DHA     |
| N1–H1A...O6 | 0.890(3)   | 2.220(3)     | 3.074(4)     | 160.6(2) |
| N1–H1C...O3 | 0.890(3)   | 1.852(3)     | 2.741(4)     | 177.1(2) |
| N1–H1B...O4 | 0.890(3)   | 2.077(3)     | 2.956(5)     | 169.0(2) |
| N2–H2A...O6 | 0.890(4)   | 2.028(4)     | 2.915(4)     | 174.1(2) |
| N2–H2B...O4 | 0.890(3)   | 2.051(3)     | 2.878(4)     | 154.0(2) |
| N2–H2C...O2 | 0.890(3)   | 1.958(3)     | 2.795(4)     | 156.0(2) |
| N2–H2C...O1 | 0.890(3)   | 2.415(2)     | 2.998(4)     | 123.4(2) |
| O6–H6A...O3 | 0.850(3)   | 1.896(3)     | 2.742(4)     | 174.1(3) |
| O6–H6B...O5 | 0.859(10)  | 1.889(17)    | 2.712(4)     | 160(3)   |

  

| Form III    |            |              |              |          |
|-------------|------------|--------------|--------------|----------|
| D–H...A     | D(D-H) / Å | d(H...A) / Å | d(D...A) / Å | <DHA     |
| N1–H1A...O4 | 0.890(3)   | 1.995(2)     | 2.885(3)     | 178.6(2) |
| N1–H1C...O2 | 0.890(3)   | 2.057(2)     | 2.942(3)     | 172.8(2) |
| N1–H1B...O3 | 0.890(3)   | 1.945(2)     | 2.829(3)     | 172.4(2) |
| N2–H2A...O2 | 0.890(2)   | 1.949(2)     | 2.829(3)     | 169.7(2) |
| N2–H2B...O6 | 0.890(3)   | 2.104(2)     | 2.922(3)     | 152.2(2) |
| N2–H2C...O5 | 0.890(3)   | 1.900(3)     | 2.783(4)     | 171.7(2) |
| O6–H6A...O3 | 0.850(2)   | 2.015(2)     | 2.864(3)     | 177.1(1) |
| O6–H6B...O5 | 0.850(2)   | 1.908(2)     | 2.757(3)     | 177.1(2) |

**Table S2.** Torsion angles (°) data of the nylon 4F monomer salt three crystal forms.

| Form I               |           | Form HI         |            | Form HII        |           |
|----------------------|-----------|-----------------|------------|-----------------|-----------|
| C8#1-C8-C7-N1        | 177.3(3)  | N1-C7-C8-C8#1   | -178.4 (4) | N1-C7-C8-C8#1   | 64.1(5)   |
| N2-C9-C10-C10#2      | 177.4(3)  | N2-C9-C10-C10#2 | -179.7 (4) | N2-C9-C10-C10#2 | 66.4(9)   |
| C5-O1-C2-C3          | -0.5(3)   | C5-O1-C2-C3     | -0.8 (4)   | C5-O1-C2-C3     | 1.0(3)    |
| C5-O1-C2-C1          | -179.9(2) | C5-O1-C2-C1     | 177.4 (3)  | C5-O1-C2-C1     | 178.2(2)  |
| C4-O3-C2-O1          | -0.2(4)   | O1-C2-C3-C4     | 0.4 (4)    | O1-C2-C3-C4     | -0.8(3)   |
| C4-C3-C2-C1          | 179.0(3)  | C1-C2-C3-C4     | -177.3 (4) | C1-C2-C3-C4     | -177.2(3) |
| O2-C1-C2-O1          | 10.3(4)   | O2-C1-C2-O1     | 2.0(5)     | O2-C1-C2-O1     | 5.4(4)    |
| O3-C1-C2-O1          | -168.3(2) | O3-C1-C2-O1     | -179.4 (3) | O3-C1-C2-O1     | -174.0(2) |
| O2-C1-C2-C3          | -168.9(3) | O2-C1-C2-C3     | 179.5(4)   | O2-C1-C2-C3     | -178.3(3) |
| O3-C1-C2-C3          | 12.5(5)   | O3-C1-C2-C3     | -1.9(6)    | O3-C1-C2-C3     | 2.2(5)    |
| C2-O1-C5-C4          | 1.0(3)    | C2-O1-C5-C4     | 0.8(4)     | C2-O1-C5-C4     | -0.7(3)   |
| C2-O1-C5-C6          | -178.7(2) | C2-O1-C5-C6     | 177.5(3)   | C2-O1-C5-C6     | 179.0(3)  |
| C4-C5-C6-O5          | 1.3(5)    | C4-C5-C6-O5     | -18.5(6)   | C4-C5-C6-O5     | 3.3(5)    |
| O1-C5-C6-O5          | -179.1(3) | O1-C5-C6-O5     | 165.7(3)   | O1-C5-C6-O5     | -176.4(3) |
| C4-C5-C6-O4          | -178.3(3) | C4-C5-C6-O4     | 159.3(4)   | C4-C5-C6-O4     | -177.3(3) |
| O1-C5-C6-O4          | 1.3(4)    | O1-C5-C6-O4     | -16.5(5)   | O1-C5-C6-O4     | 3.0(4)    |
| O1-C5-C4-C3          | -1.1(4)   | C3-C4-C5-O1     | -0.5(4)    | C3-C4-C5-O1     | 0.2(3)    |
| C6-C5-C4-C3          | 178.5(3)  | C3-C4-C5-C6     | -176.6(4)  | C3-C4-C5-C6     | -179.4(3) |
| C2-C3-C4-C5          | 0.8(4)    | C2-C3-C4-C5     | 0.1(4)     | C2-C3-C4-C5     | 0.4(3)    |
| Form HII (continued) |           |                 |            |                 |           |
|                      |           | N2-C9-C10-C10#2 | -66(2)     |                 |           |

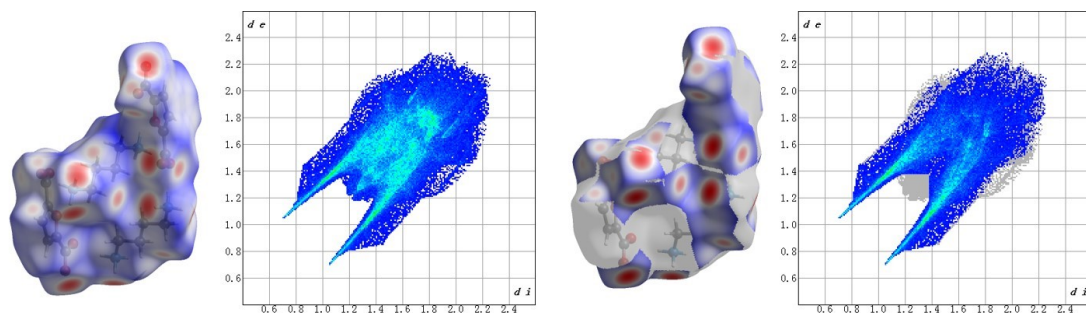

(a) All...All

(b) H...O/O...H (54.7%)

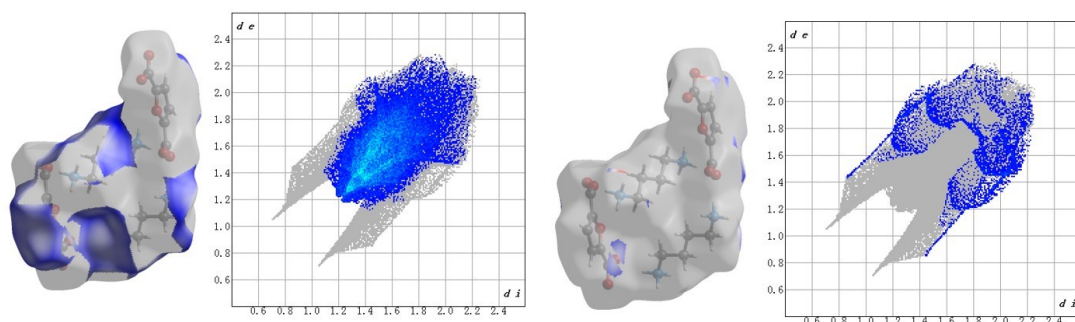

(c) H...H (33.9%)

(d) H...C/C...H (4.2%)

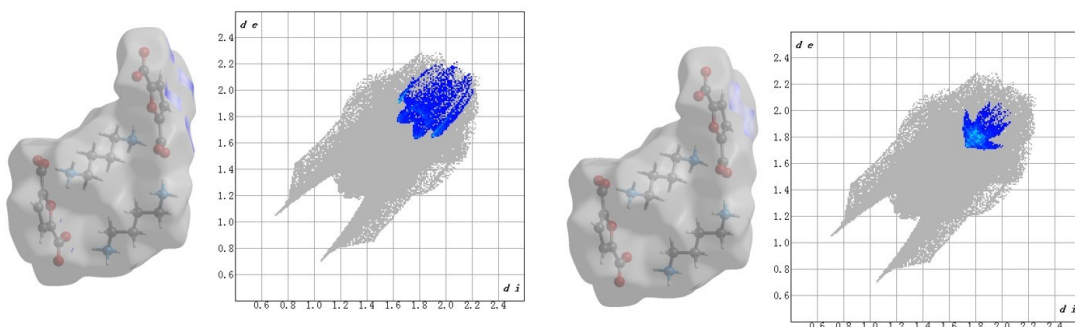

(e) O...C/C...O (3.6%)

(f) C...C (3.2%)

**Figure S4.** Hirshfeld surfaces of the Form I and its corresponding fingerprint plots.

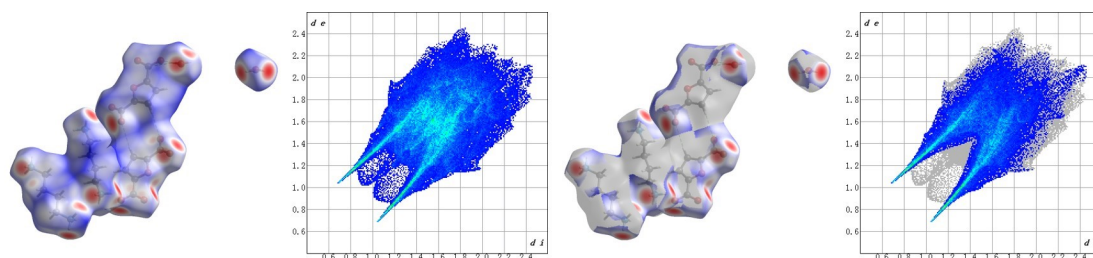

(a) All...All

(b) H...O/O...H (50.8%)

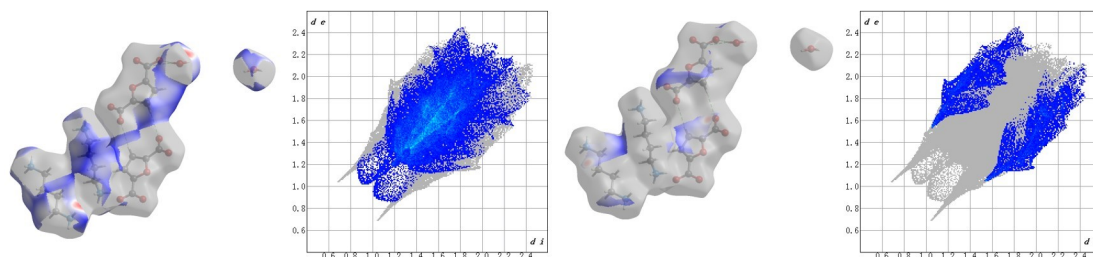

(c) H...H (30.1%)

(d) H...C/C...H (9.8%)

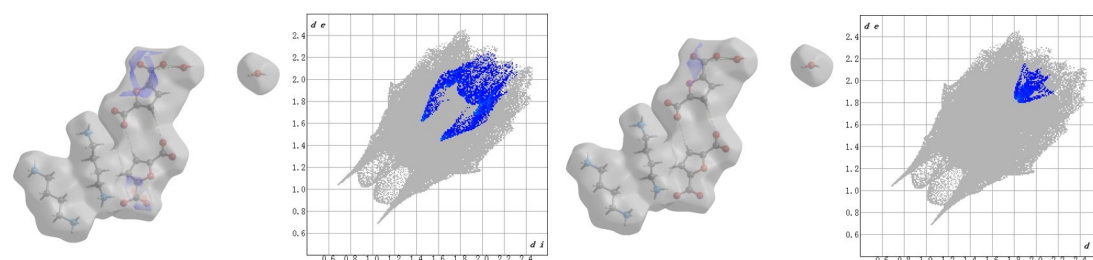

(e) O...C/C...O (4.3%)

(f) C...C (1.1%)

**Figure S5.** Hirshfeld surfaces of the Form HI and its corresponding fingerprint plots.

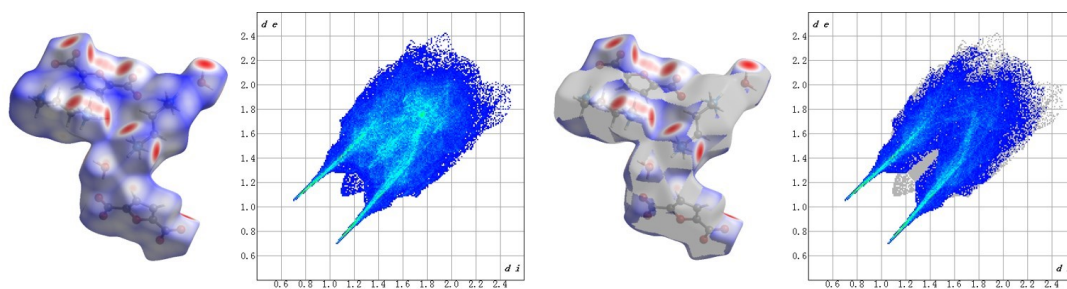

(a) All...All

(b) H...O/O...H (50.1%)

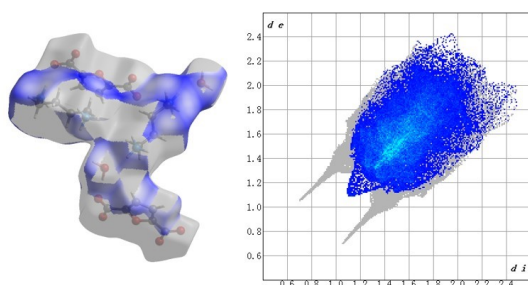

(c) H...H (37.6%)

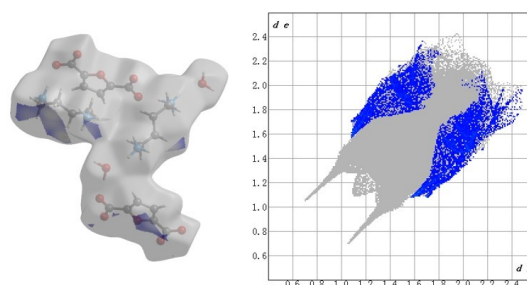

(d) H...C/C...H (5.9%)

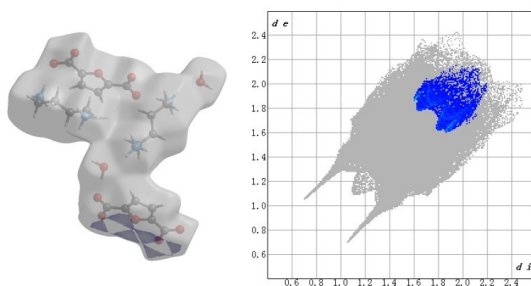

(e) O...C/C...O (4.1%)

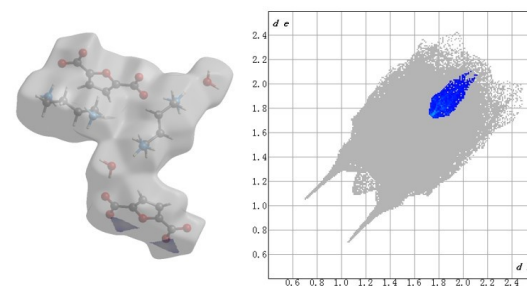

(f) C...C (1.6%)

**Figure S6.** Hirshfeld surfaces of the Form HIII and its corresponding fingerprint plots.

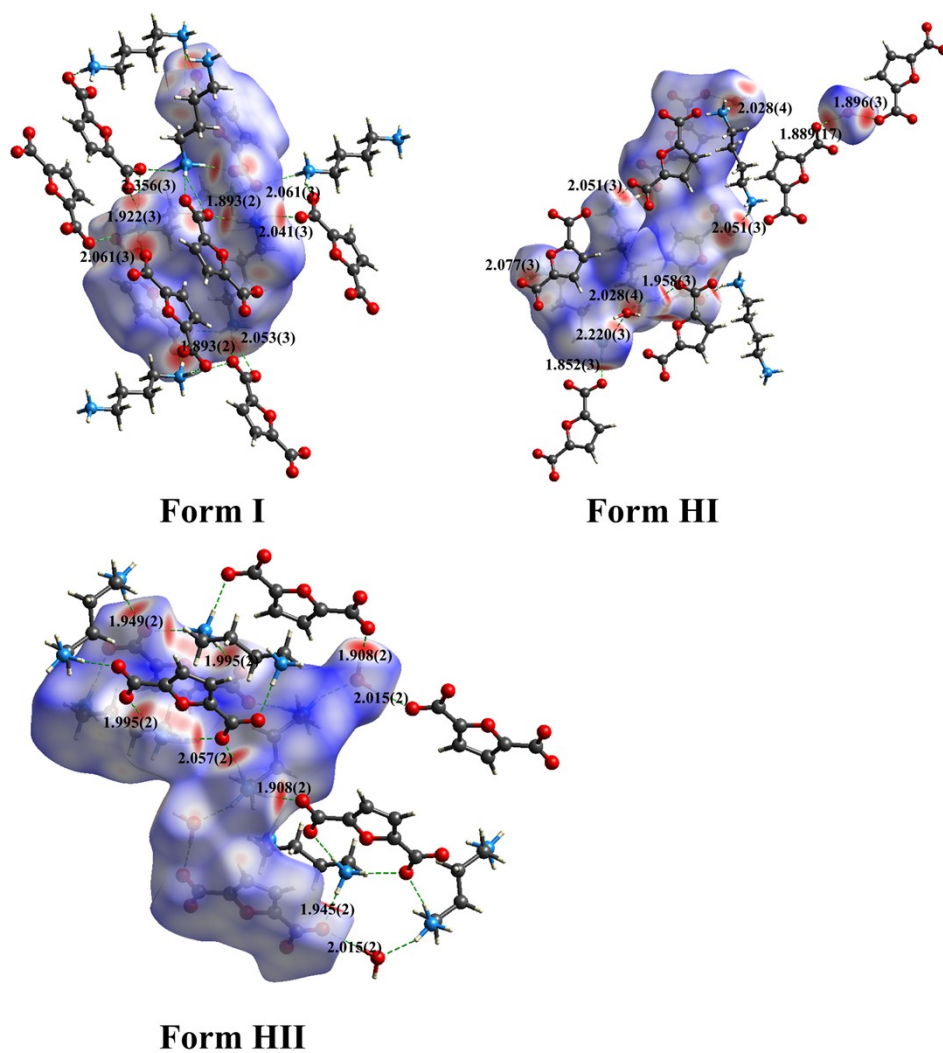

**Figure S7.** The distance of hydrogen-bond contacts of three forms of nylon 4F salt in Figure 5.



**Table S3.** Experimental mole fraction solubility of nylon 4F monomer salt Form I ( $x_1$ ) and calculated CNIBS/RS mole fraction solubility ( $x^{\text{calcd}}$ ) in binary solvent mixtures of water + ethanol.

| T/K    | $x_2$ | $10^4 x_1$ | $10^4 x^{\text{calcd}}$ | $10^2(x_1 - x^{\text{calcd}})/x_1$ |
|--------|-------|------------|-------------------------|------------------------------------|
| 283.15 | 0.7   | 2.4480     | 2.4482                  | -0.0093                            |
|        | 0.75  | 1.1717     | 1.1698                  | 0.1687                             |
|        | 0.8   | 0.5516     | 0.5576                  | -1.0927                            |
|        | 0.85  | 0.2726     | 0.2643                  | 3.0443                             |
|        | 0.9   | 0.1196     | 0.1240                  | -3.6661                            |
|        | 0.95  | 0.0574     | 0.0573                  | 0.1585                             |
| 293.15 | 0.7   | 2.8781     | 2.8803                  | -0.0764                            |
|        | 0.75  | 1.5054     | 1.4932                  | 0.8106                             |
|        | 0.8   | 0.6728     | 0.6989                  | -3.8767                            |
|        | 0.85  | 0.3408     | 0.3211                  | 5.7719                             |
|        | 0.9   | 0.1611     | 0.1592                  | 1.1681                             |
|        | 0.95  | 0.0909     | 0.0946                  | -4.1449                            |
| 303.15 | 0.7   | 3.6498     | 3.6188                  | 0.8498                             |
|        | 0.75  | 1.8596     | 1.8796                  | -1.0742                            |
|        | 0.8   | 0.8442     | 0.9134                  | -8.2050                            |
|        | 0.85  | 0.5041     | 0.4676                  | 7.2275                             |
|        | 0.9   | 0.4192     | 0.2879                  | 31.3249                            |
|        | 0.95  | 0.1772     | 0.2468                  | -39.2395                           |

**Table S4.** Parameters of the CNIBS/RS model for the solubility of nylon 4F monomer salt Form I in water and binary solvent mixtures of water + ethanol.

| T/K    | $B_1$    | $B_2$    | $B_3$    | $B_4$     | $B_5$   | R-Square | $10^2\text{RMSD}$ |
|--------|----------|----------|----------|-----------|---------|----------|-------------------|
| 283.15 | 10.5390  | -9.4878  | -14.0963 | 16.0359   | -6.6444 | 0.9999   | 0.4626            |
| 293.15 | -21.6454 | 71.1574  | -12.4050 | -111.7530 | 72.0655 | 0.9990   | 1.4368            |
| 303.15 | -29.8683 | 101.0490 | -35.8501 | -129.0101 | 92.6181 | 0.9967   | 7.0200            |

**Table S5.** Parameters of the modified Apelblat model for nylon 4F monomer salt in pure water.

| solvent    | A       | B          | C       | R-Square | 10 <sup>6</sup> RMSD |
|------------|---------|------------|---------|----------|----------------------|
| Pure water | 58.4332 | -3510.2090 | -8.6256 | 0.9940   | 3.2648               |
